# Supplementary material
Source: PubMed Central journal article supplement (PMC6532066)
Supplement: NIHMS1521674-supplement-1.pdf [file NIHMS1521674-supplement-1.pdf]

Extended Data Fig.1c

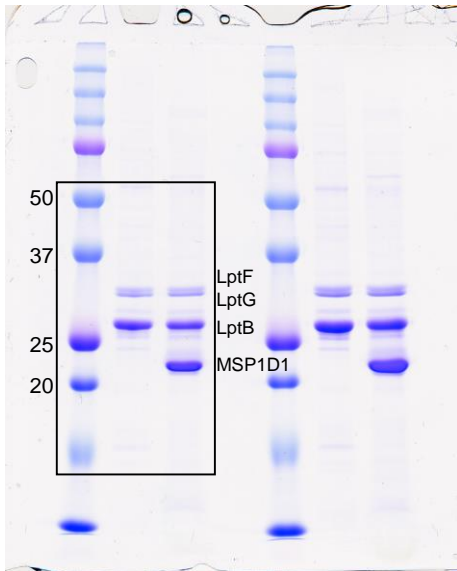

Extended Data Fig.1f

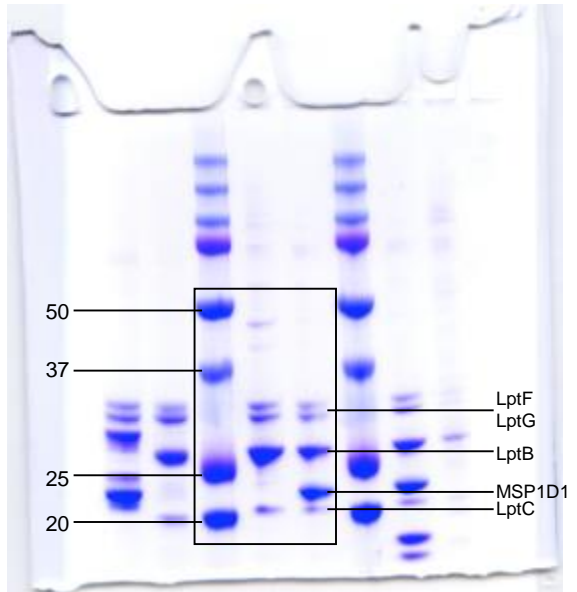

**Supplementary Figure 1 | Original source images of SDS-PAGE gels.** The uncropped scans with size marker indications for the Coomassie blue-stained SDS-PAGE gels.
